# Supplementary material for: Characterization of Local Products for Their Industrial Use: The Case of Italian Potato Cultivars Analyzed by Untargeted and Targeted Methodologies
Source: PubMed Central journal article supplement (PMC7555304; doi:10.3390/foods9091216), 2020-09-02
Supplement: foods-09-01216-s001.pdf [file foods-09-01216-s001.pdf]

# Characterization of local products for their industrial use: the case of Italian potato cultivars analyzed by untargeted and targeted methodologies

Cinzia Ingallina<sup>1,§</sup>, Mattia Spano<sup>1,§</sup>, Anatoly P. Sobolev<sup>2\*</sup>, Cristina Esposito<sup>3</sup>, Cristina Santarcangelo<sup>3</sup>, Alessandra Baldi<sup>4</sup>, Maria Daglia<sup>3,5\*</sup>, Luisa Mannina<sup>1,2</sup>

<sup>1</sup> Department of Chemistry and Technology of Drugs, Sapienza University of Rome, Piazzale Aldo Moro 5, 00185 Rome, Italy; [cinzia.ingallina@uniroma1.it](mailto:cinzia.ingallina@uniroma1.it) (C.I.); [mattia.spano@uniroma1.it](mailto:mattia.spano@uniroma1.it) (M.S.); [luisa.mannina@uniroma1.it](mailto:luisa.mannina@uniroma1.it) (L.M.)

<sup>2</sup> Institute for Biological Systems, Magnetic Resonance Laboratory "Segre-Capitani", CNR, Via Salaria Km 29.300, 00015 Monterotondo (Rome), Italy

<sup>3</sup> Department of Pharmacy, University of Naples Federico II, Naples, 80138, Italy; [cristina.esposito@unina.it](mailto:cristina.esposito@unina.it) (C.E.); [cristina.santarcangelo@unina.it](mailto:cristina.santarcangelo@unina.it) (C.S.)

<sup>4</sup> Tefarco Innova, Parco Area delle Scienze 27/A – Campus 43124 Parma, Italy; [alessandra.baldi.alimenti@gmail.com](mailto:alessandra.baldi.alimenti@gmail.com) (A.B.)

<sup>5</sup> International Research Center for Food Nutrition and Safety, Jiangsu University, 212013 Zhenjiang, China

\* Correspondence: [anatoly.sobolev@cnr.it](mailto:anatoly.sobolev@cnr.it) (A.P.S.); [maria.daglia@unina.it](mailto:maria.daglia@unina.it) (M.D.); Tel.: +39-06-9067-2385 (A.P.S.); Tel.: +39-081-678644

§These authors contributed equally to this work

Received: date; Accepted: date; Published: date

## Appendix-SA. Plot design of potato cultivation.

For each cultivar, a block of 50 rows (50 tubers for row) was planted, with an 80 cm distance between tubers.

## Appendix-SB. MS identification and calibration curves of caffeic, chlorogenic, ferulic, gallic and galacturonic acids.

### *App-B.1 MS identification of caffeic, chlorogenic, ferulic, gallic and galacturonic acids*

Caffeic acid showed parent ion with  $m/z$  of 179 and principal fragment at  $m/z$  of 135, which derived by the CO<sub>2</sub> loss (- 44 Da) from the carboxylic acid group. Chlorogenic acid presented a molecular ion at  $m/z$  353 and fragmentation ions 191, 179, 135. Ferulic acid showed [M-H]<sup>-</sup>  $m/z$  of 193 and a fragment ion at  $m/z$  134 corresponding to [M-CO<sub>2</sub>-CH<sub>3</sub>]<sup>-</sup>. Gallic acid and galacturonic acid present as parent ions with  $m/z$  of 169 and 193, respectively. Both compounds break up to CO<sub>2</sub> loss (- 44 Da) with production of fragment ions at  $m/z$  of 125 and 149, respectively.

### *App-B.2 Calibration curves of caffeic, chlorogenic, ferulic, gallic and galacturonic acids*

To quantify caffeic, chlorogenic, ferulic, gallic and galacturonic acids, a calibration curve was constructed using external standards for each compound. Stock solutions of analytical standard grade caffeic, chlorogenic, ferulic, gallic and galacturonic acids (10 µg/mL) were prepared in methanol. Caffeic and chlorogenic acids stock solutions were diluted to obtain five concentrations ranging from 10 to 1000 ng/mL ( $R^2 = 0.9998$ ). Ferulic, gallic and galacturonic acids stock solutions were diluted to obtain five concentrations ranging from 0.01 to 50 ng/mL ( $R^2 = 0.9996$ ). The analyses were performed in triplicate for each concentration.

**Table S1.** Compounds and relative signals (<sup>1</sup>H NMR chemical shift, ppm) selected for the quantitative analysis of the hydroalcoholic and organic extracts by mean NMR.

| <sup>1</sup> H Chemical shift (ppm) | Group                                         | Compound                      |
|-------------------------------------|-----------------------------------------------|-------------------------------|
| <b>Hydroalcoholic extract</b>       |                                               |                               |
| 0.96                                | CH <sub>3</sub>                               | Leucine                       |
| 1.02                                | CH <sub>3</sub>                               | Isoleucine                    |
| 1.05                                | CH <sub>3</sub>                               | Valine                        |
| 1.33                                | CH <sub>3</sub>                               | Lactic acid                   |
| 1.34                                | CH <sub>3</sub>                               | Threonine                     |
| 1.49                                | CH <sub>3</sub>                               | Alanine                       |
| 2.01                                | CH <sub>2</sub>                               | Proline                       |
| 2.30                                | CH <sub>2</sub>                               | GABA                          |
| 2.46                                | CH                                            | Glutamine                     |
| 2.55                                | CH                                            | Citric Acid                   |
| 2.81                                | CH <sub>2</sub>                               | Aspartate                     |
| 2.97                                | CH <sub>2</sub>                               | Asparagine                    |
| 3.21                                | <sup>+</sup> N(CH <sub>3</sub> ) <sub>3</sub> | Choline                       |
| 3.30                                | CH                                            | Myo-inositol                  |
| 4.12                                | CH                                            | Fructose                      |
| 4.31                                | CH                                            | Malic Acid                    |
| 4.60                                | CH                                            | β-Galactose                   |
| 4.66                                | CH                                            | β-Glucose                     |
| 5.25                                | CH                                            | α-Glucose                     |
| 5.28                                | CH                                            | α-Galactose                   |
| 5.42                                | CH                                            | Sucrose                       |
| 6.53                                | CH                                            | Fumaric acid                  |
| 6.90                                | CH                                            | Tyrosine                      |
| 7.43                                | CH                                            | Phenylalanine                 |
| 8.46                                | CH                                            | Formic Acid                   |
| 8.84                                | CH                                            | Trigonelline                  |
| <b>Organic extract</b>              |                                               |                               |
| 0.66                                | CH <sub>3</sub>                               | β-Sitosterol                  |
| 2.30                                | α-CH <sub>2</sub>                             | Total fatty acids             |
| 2.73                                | CH <sub>2</sub>                               | Di-unsaturated fatty acids    |
| 2.77                                | CH <sub>2</sub>                               | Tri-unsaturated fatty acids   |
| 3.12                                | CH <sub>2</sub>                               | Phosphatidylethanolamine      |
| 3.21                                | <sup>+</sup> N(CH <sub>3</sub> ) <sub>3</sub> | Phosphatidylcholine           |
| 4.87                                | CH                                            | Digalactosyldiacylglycerol    |
| 5.31                                | CH=CH                                         | Total unsaturated fatty acids |

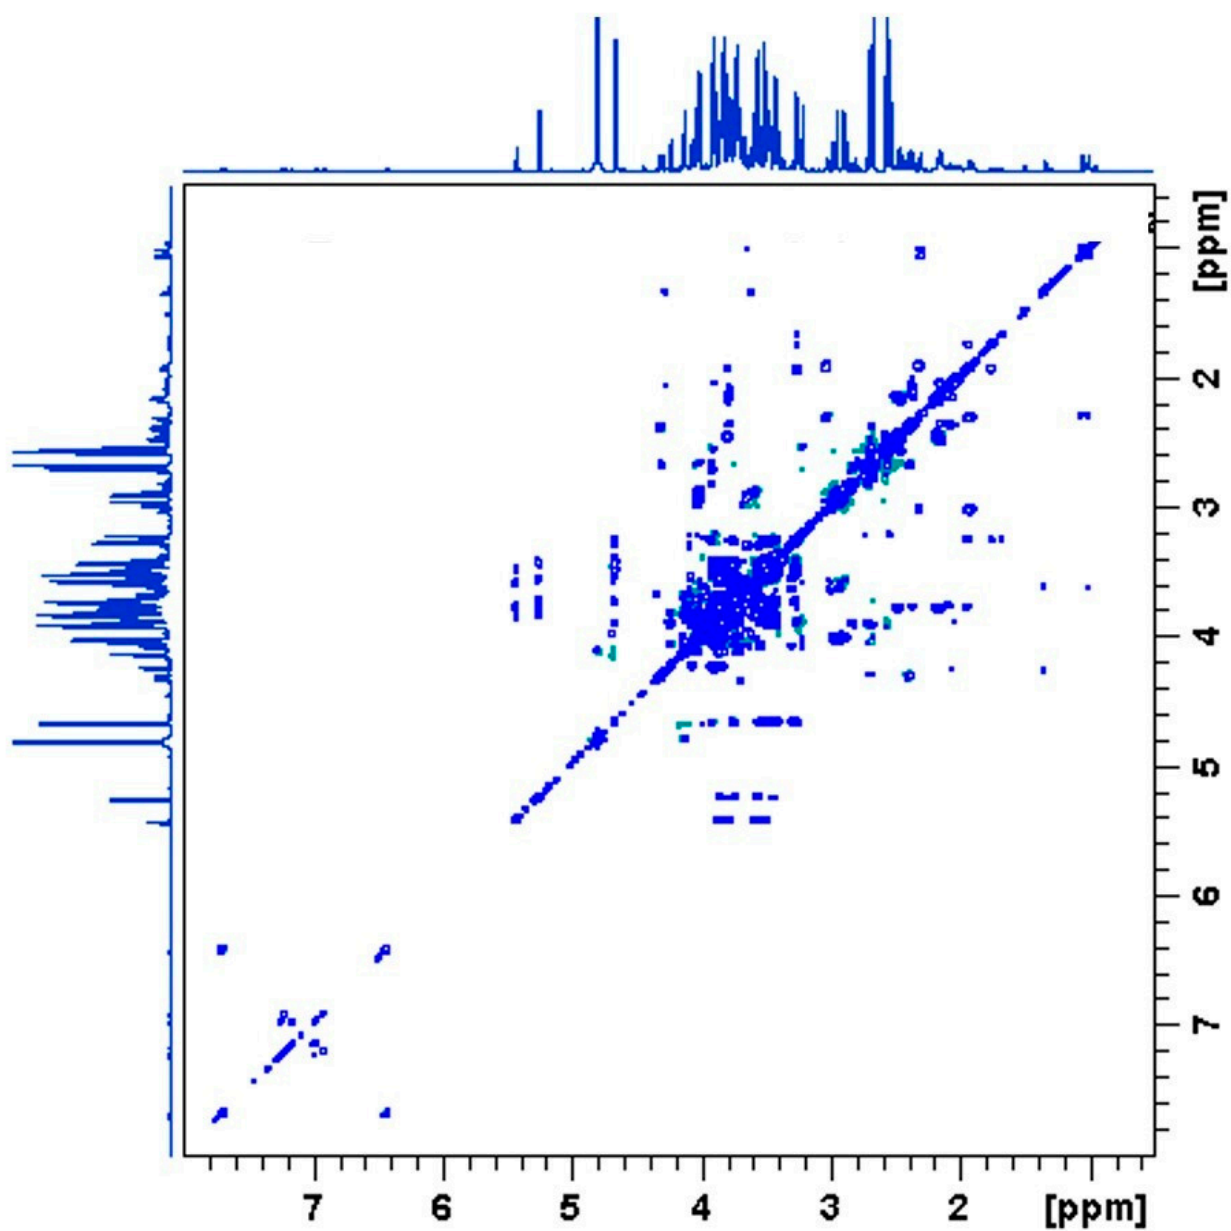

**Figure S1.**  $^1\text{H}$ - $^1\text{H}$  TOCSY spectra (28 °C) of potato hydroalcoholic extract in 400 mM phosphate buffer in  $\text{D}_2\text{O}$  (pH 7.4) 1 mM TSP (0.5 – 8.0 ppm region is here considered).

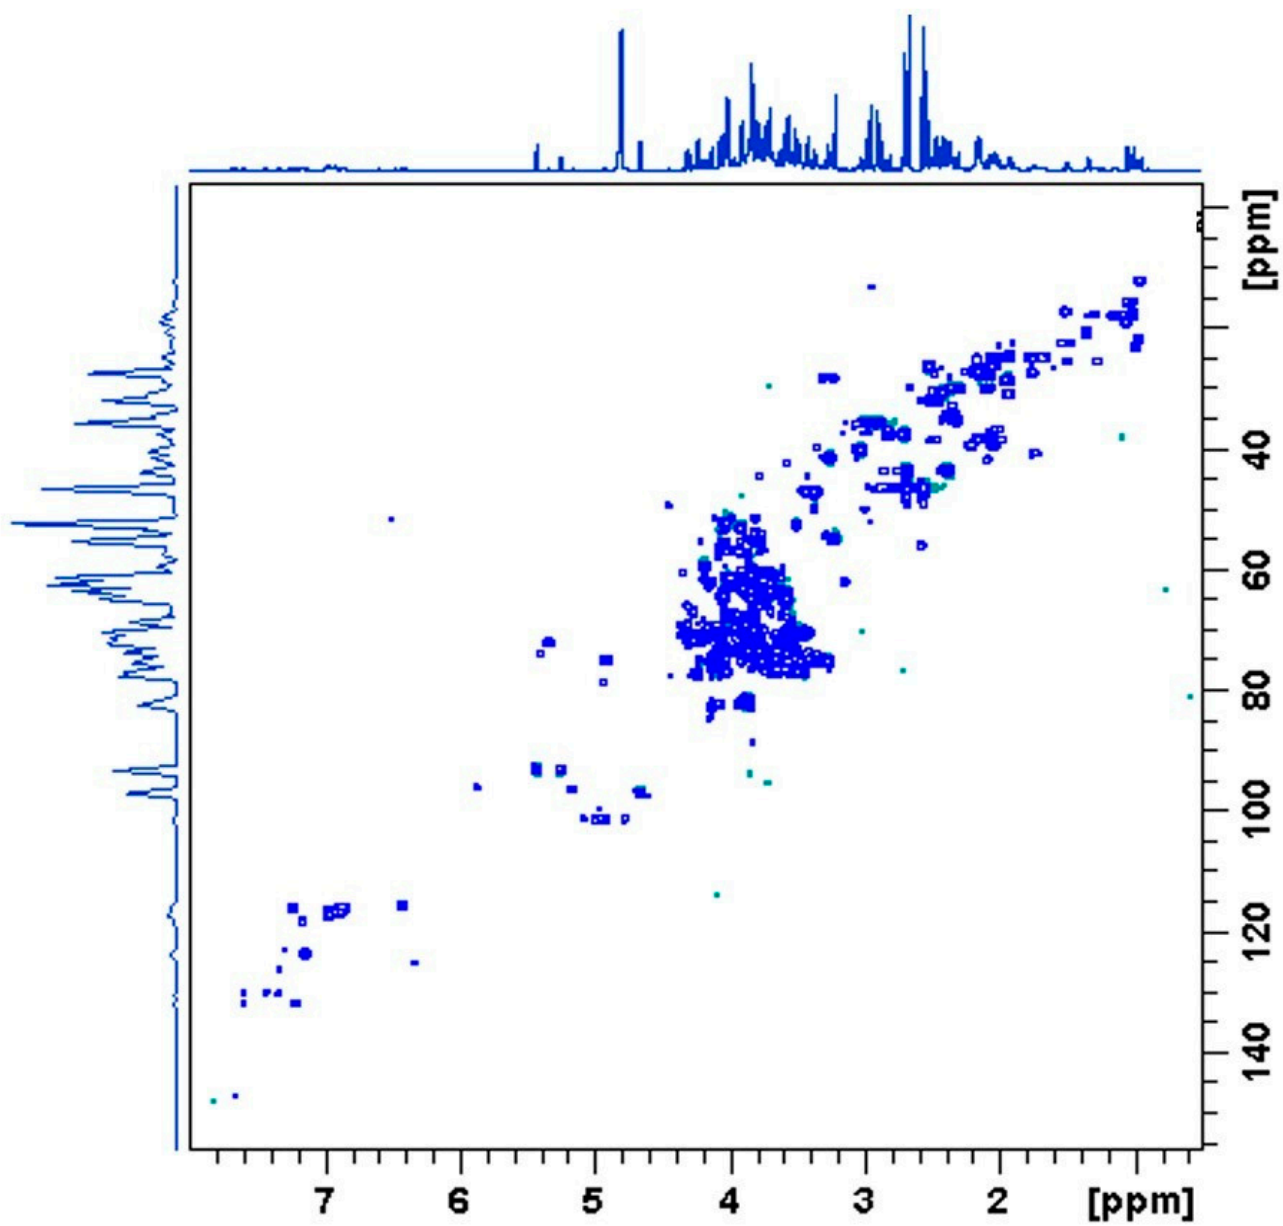

**Figure S2.**  $^1\text{H}$ - $^{13}\text{C}$  HSQC spectra (28 °C) of potato hydroalcoholic extract in phosphate buffer in  $\text{D}_2\text{O}$  (pH 7.4) (0.5 – 8.0 ppm region is here considered).

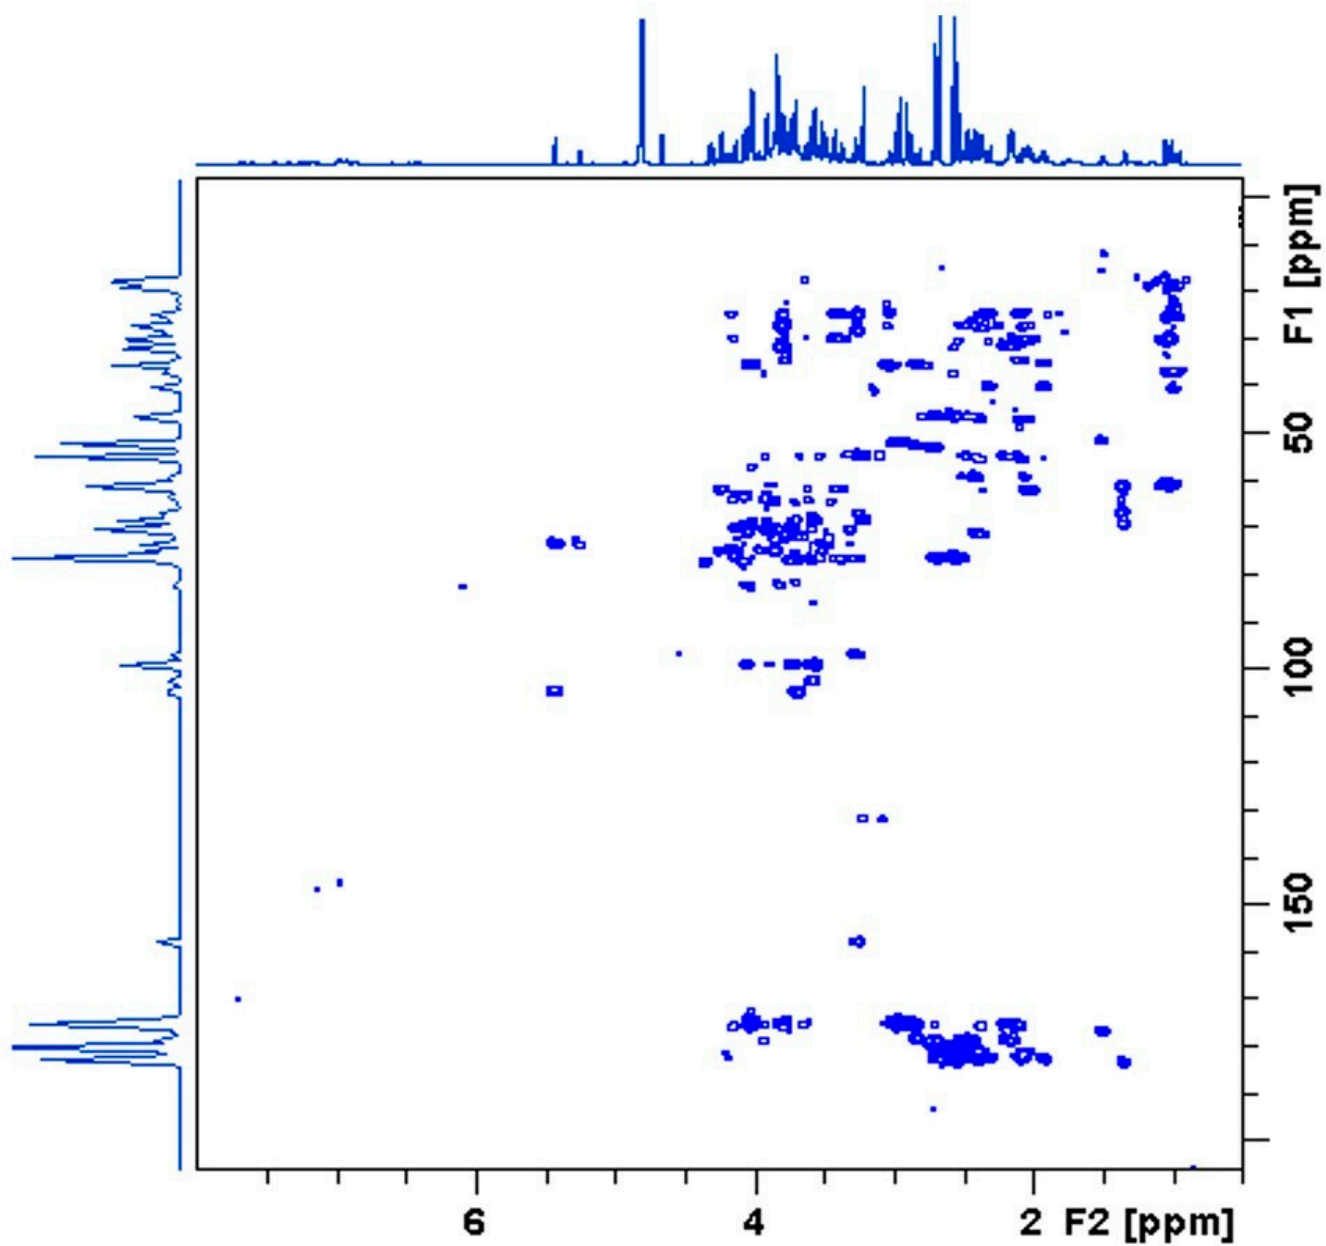

**Figure S3.**  $^1\text{H}$ - $^{13}\text{C}$  HMBC spectra (28 °C) of potato hydroalcoholic extract in phosphate buffer in  $\text{D}_2\text{O}$  (pH 7.4) (0.5 – 8.0 ppm region is here considered).

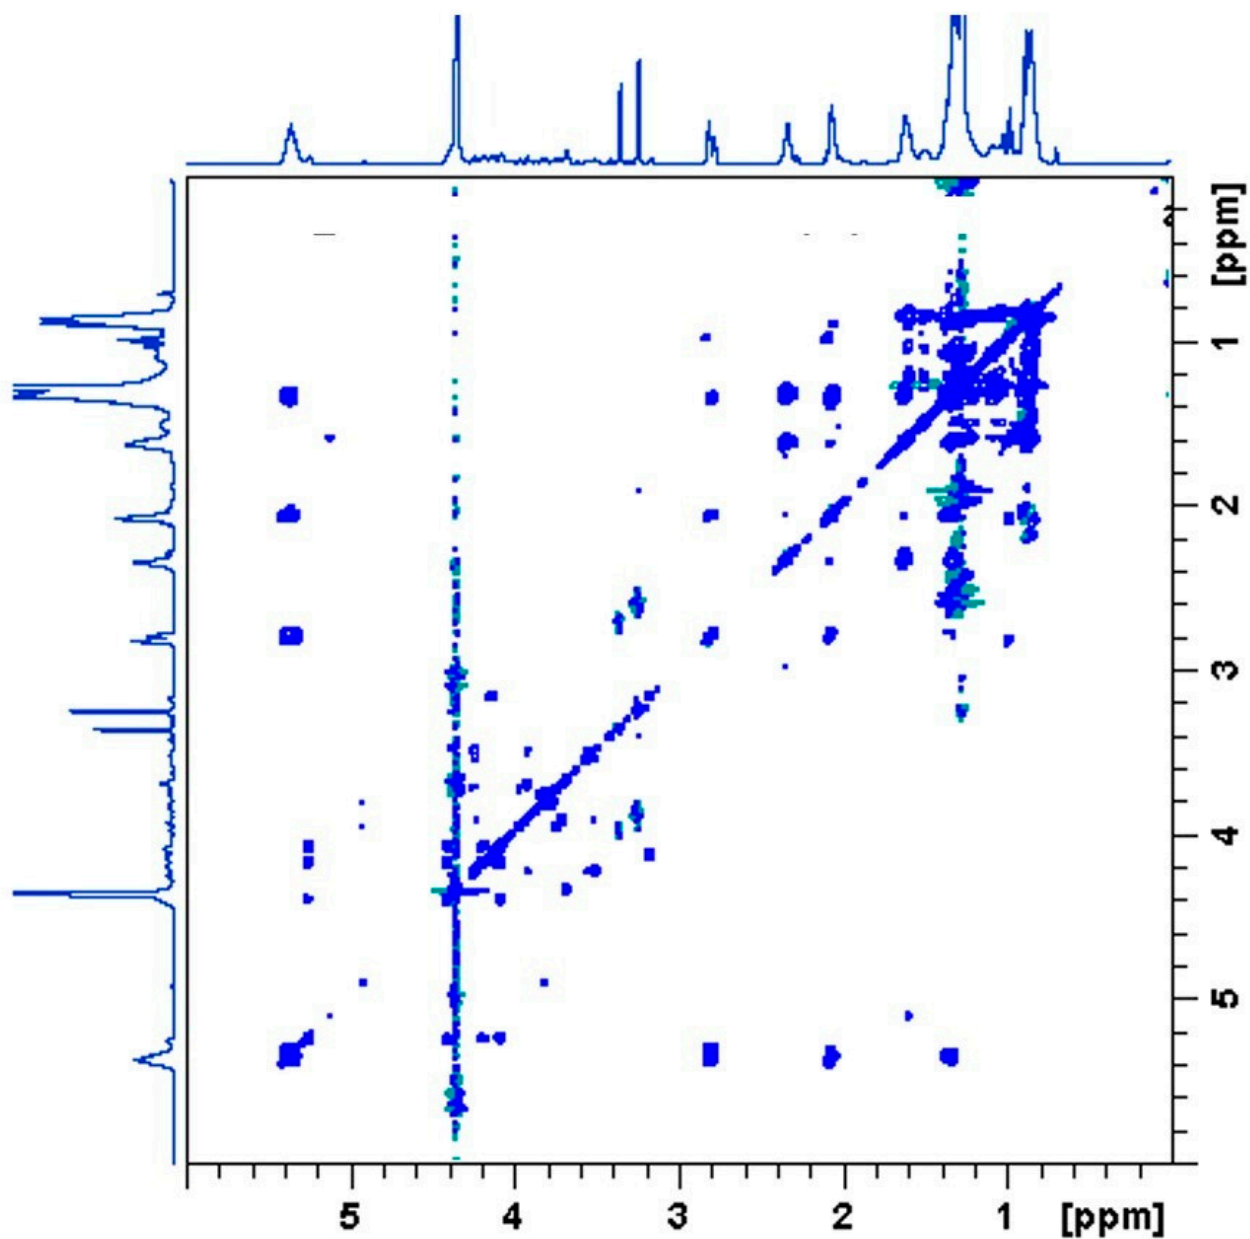

**Figure S4.**  $^1\text{H}$ - $^1\text{H}$  TOCSY spectra (28 °C) of potato organic extract in  $\text{CDCl}_3/\text{CD}_3\text{OD}$  2:1 v/v mixture (0 – 6.0 ppm region is here considered).

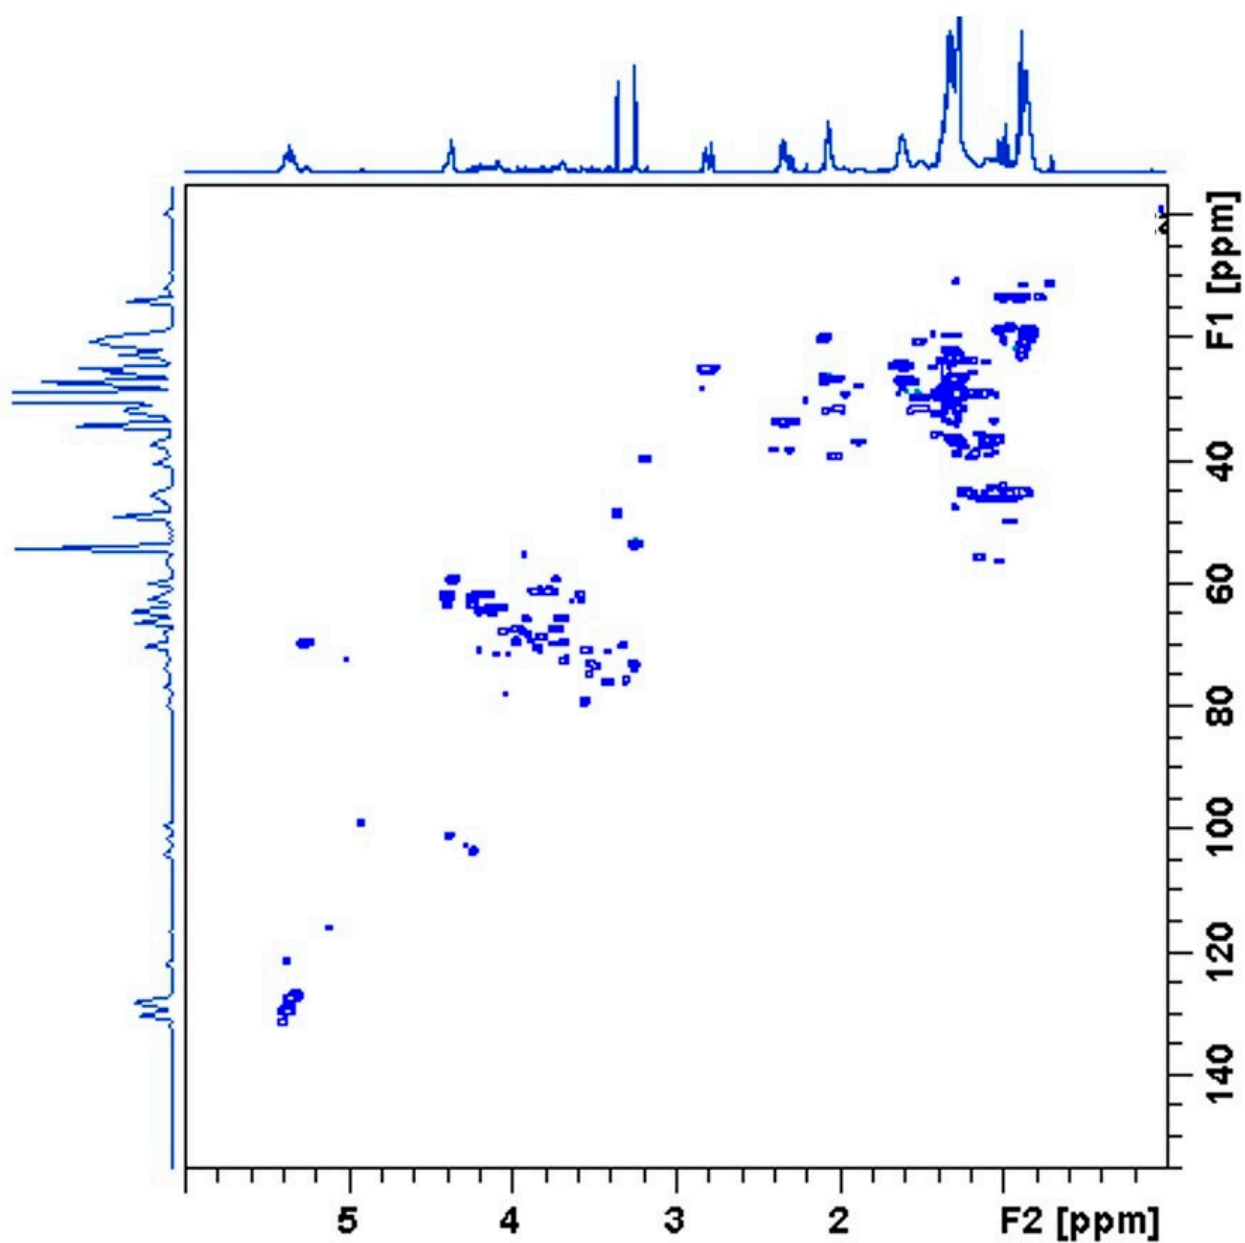

**Figure S5.**  $^1\text{H}$ - $^{13}\text{C}$  HSQC spectra (28 °C) of potato organic extract in  $\text{CDCl}_3/\text{CD}_3\text{OD}$  2:1 v/v mixture (0 – 6.0 ppm region is here considered).

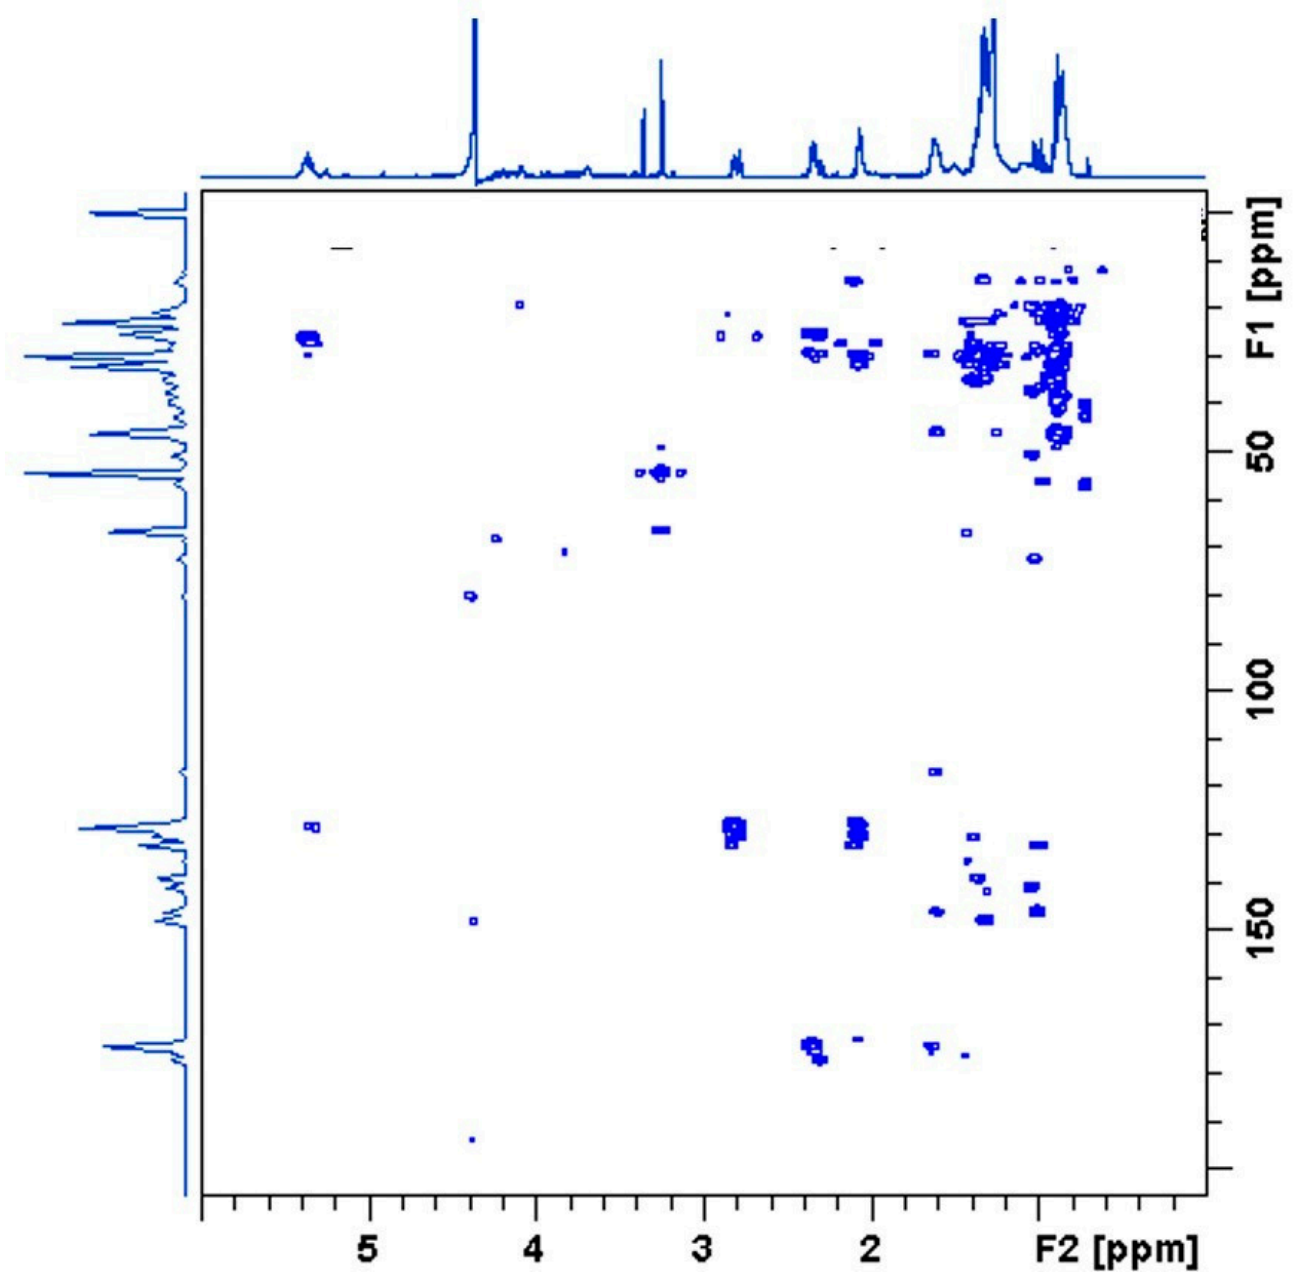

**Figure S6.**  $^1\text{H}$ - $^{13}\text{C}$  HMBC spectra (28 °C) of potato organic extract in  $\text{CDCl}_3/\text{CD}_3\text{OD}$  2:1 v/v mixture (0 – 6.0 ppm region is here considered).



**Table S2.** Metabolites identified in the 600.13 MHz <sup>1</sup>H NMR spectra (28 °C) of potato hydroalcoholic extracts in phosphate buffer in D<sub>2</sub>O (pH 7.4).

| Compound                  | Assignment            | <sup>1</sup> H (ppm) | Multiplicity [J(Hz)] | <sup>13</sup> C (ppm) |
|---------------------------|-----------------------|----------------------|----------------------|-----------------------|
| <b>Sugars and polyols</b> |                       |                      |                      |                       |
| α-D-Fructofuranose        | CH-3                  | 4.12                 |                      | 83.0                  |
|                           | CH-5                  | 4.07                 |                      | 82.5                  |
| β-D-Fructofuranose        | CH-3                  | 4.12                 |                      | 76.5                  |
|                           | CH-4                  | 4.12                 |                      | 75.4                  |
|                           | CH-5                  | 3.81                 |                      |                       |
|                           | CH <sub>2</sub> -6,6' | 3.70, 3.84           |                      |                       |
| β-D-Fructopyranose        | CH-3                  | 3.80                 |                      | 68.6                  |
|                           | CH-4                  | 4.00                 |                      | 77.0                  |
|                           | CH-5                  | 4.04                 |                      |                       |
|                           | CH <sub>2</sub> -6,6' | 3.71; 4.08           |                      | 64.4                  |
| α-Galactose               | CH-1                  | 5.28                 | d [3.8]              | 92.3                  |
|                           | CH-2                  | 3.87                 |                      |                       |
|                           | CH-3                  | 3.99                 |                      |                       |
| β-Galactose               | CH-1                  | 4.60                 | d [8.0]              | 97.1                  |
|                           | CH-2                  | 3.51                 |                      |                       |
|                           | CH-3                  | 3.67                 |                      |                       |
|                           | CH-4                  | 3.95                 |                      |                       |
| α-Glucose                 | CH-1                  | 5.25                 | d [3.8]              | 93.2                  |
|                           | CH-2                  | 3.54                 |                      | 72.0                  |
|                           | CH-3                  | 3.71                 |                      | 73.3                  |
|                           | CH-4                  | 3.42                 |                      | 70.7                  |
|                           | CH-5                  | 3.84                 |                      | 72.5                  |
|                           | CH <sub>2</sub> -6,6' | 3.89; 3.75           |                      | 61.8                  |
| β-Glucose                 | CH-1                  | 4.66                 | d [8.0]              | 97.0                  |
|                           | CH-2                  | 3.26                 |                      | 75.1                  |
|                           | CH-3                  | 3.51                 |                      | 76.9                  |
|                           | CH-4                  | 3.42                 |                      | 70.7                  |

|                      |                          |            |                |       |
|----------------------|--------------------------|------------|----------------|-------|
|                      | CH-5                     | 3.49       |                | 76.8  |
|                      | CH <sub>2</sub> -6,6'    | 3.90; 3.75 |                | 61.8  |
| Myo-Inositol         | CH-1                     | 4.07       |                |       |
|                      | CH-2,5                   | 3.57       |                |       |
|                      | CH-3,6                   | 3.65       |                |       |
|                      | CH-4                     | 3.30       | t [9.5]        | 74.2  |
| Sucrose              | CH-1 (Glucose)           | 5.42       | d [3.8]        | 93.3  |
|                      | CH-2                     | 3.58       |                | 71.8  |
|                      | CH-3                     | 3.78       |                | 73.6  |
|                      | CH-4                     | 3.50       |                | 70.2  |
|                      | CH-5                     | 3.86       |                | 73.5  |
|                      | CH-3' (Fructose)         | 4.22       | d [8.7]        | 77.5  |
|                      | CH-4'                    | 4.07       |                | 75.1  |
|                      | CH-5'                    | 3.90       |                | 82.4  |
|                      | CH <sub>2</sub> -6'      | 3.83       |                | 61.2  |
| <b>Organic acids</b> |                          |            |                |       |
| Citric acid          | $\alpha,\gamma$ -CH      | 2.55       | d [15.9]       | 46.6  |
|                      | $\alpha',\gamma'$ -CH    | 2.68       |                | 46.6  |
|                      | $\beta$ -C               |            |                | 76.4  |
|                      | 1,5-COOH                 |            |                | 180.2 |
|                      | 6-COOH                   |            |                | 183.0 |
| Formic acid          | HCOOH                    | 8.46       | s              |       |
| Fumaric Acid         | $\alpha,\beta$ -CH=CH    | 6.52       | s              |       |
| Lactic acid          | $\beta$ -CH <sub>3</sub> | 1.33       | d [7.0]        | 20.6  |
|                      | $\alpha$ -CH             | 4.12       |                | 69.3  |
|                      | COOH                     |            |                | 183.4 |
| Malic acid           | $\alpha$ -CH             | 4.31       | dd [9.8; 3.2]  | 71.4  |
|                      | $\beta$ -CH              | 2.70       | dd [15.6; 3.2] | 43.9  |
|                      | $\beta'$ -CH             | 2.39       | dd [15.6; 9.8] | 43.9  |
| <b>Amino acids</b>   |                          |            |                |       |

|                         |                                  |            |                |       |
|-------------------------|----------------------------------|------------|----------------|-------|
| Alanine                 | $\alpha$ -CH                     | 3.80       |                | 51.5  |
|                         | $\beta$ -CH <sub>3</sub>         | 1.49       | d [7.3]        | 17.3  |
|                         | COOH                             |            |                | 176.8 |
| Arginine                | $\alpha$ -CH                     | 3.77       |                | 55.3  |
|                         | $\beta$ -CH <sub>2</sub>         | 1.91       | m              | 28.6  |
|                         | $\gamma$ -CH                     | 1.67       | m              | 25.1  |
|                         | $\gamma'$ -CH                    | 1.74       | m              | 25.1  |
|                         | $\delta$ -CH <sub>3</sub>        | 3.24       |                | 41.6  |
| Asparagine              | $\alpha$ -CH                     | 4.02       |                | 52.3  |
|                         | $\beta, \beta'$ -CH <sub>2</sub> | 2.89; 2.97 | dd [7.4; 16.9] | 35.8  |
| Aspartate               | $\alpha$ -CH                     | 3.91       |                |       |
|                         | $\beta, \beta'$ -CH <sub>2</sub> | 2.70; 2.81 | dd [3.9; 17.4] | 37.7  |
| $\gamma$ -Aminobutyrate | $\alpha$ -CH <sub>2</sub>        | 2.30       | t [7.4]        | 35.4  |
|                         | $\beta$ -CH <sub>2</sub>         | 1.91       |                | 24.3  |
|                         | $\gamma$ -CH <sub>2</sub>        | 3.01       | t [7.6]        | 39.8  |
| Glutamine               | $\alpha$ -CH                     | 3.79       |                | 54.5  |
|                         | $\beta, \beta'$ -CH <sub>2</sub> | 2.15       | m              | 26.8  |
|                         | $\gamma$ -CH                     | 2.46       | m              | 32.2  |
| Glutamate               | $\alpha$ -CH                     | 3.75       |                |       |
|                         | $\beta, \beta'$ -CH <sub>2</sub> | 2.07       | m              | 28.0  |
|                         | $\gamma$ -CH <sub>2</sub>        | 2.35       | m              | 34.6  |
| Isoleucine              | $\alpha$ -CH                     | 3.69       |                |       |
|                         | $\beta$ -CH                      | 1.98       |                | 36.7  |
|                         | $\gamma$ -CH <sub>3</sub>        | 1.27       |                | 25.1  |
|                         | $\gamma'$ -CH <sub>3</sub>       | 1.02       | d [7.0]        | 15.7  |
|                         | $\delta$ -CH <sub>3</sub>        | 0.94       |                |       |
| Leucine                 | $\beta$ -CH <sub>2</sub>         | 1.74       |                |       |
|                         | $\gamma$ -CH                     | 1.71       |                |       |
|                         | $\delta$ -CH <sub>3</sub>        | 0.97       | d [6.3]        | 23.1  |
|                         | $\delta'$ -CH <sub>3</sub>       | 0.96       | d [6.3]        | 22.1  |

|                  |                                |      |          |       |
|------------------|--------------------------------|------|----------|-------|
| Lysine           | $\alpha$ -CH                   | 3.74 |          |       |
|                  | $\beta$ -CH <sub>2</sub>       | 1.91 | m        | 31.0  |
|                  | $\gamma$ -CH                   | 1.45 | m        | 22.6  |
|                  | $\gamma'$ -CH                  | 1.52 | m        | 22.6  |
|                  | $\delta$ -CH <sub>2</sub>      | 1.73 | m        | 27.3  |
|                  | $\varepsilon$ -CH <sub>2</sub> | 3.02 |          |       |
| Phenylalanine    | CH-2,6                         | 7.34 | m        |       |
|                  | CH-4                           | 7.38 | m        |       |
|                  | CH-3,5                         | 7.43 | m        | 130.2 |
| Proline          | $\beta$ -CH                    | 2.35 |          |       |
|                  | $\gamma$ -CH <sub>2</sub>      | 2.01 | m        | 24.8  |
| Threonine        | $\alpha$ -CH                   | 3.60 |          | 61.1  |
|                  | $\beta$ -CH                    | 4.31 |          | 66.7  |
|                  | $\gamma$ -CH <sub>3</sub>      | 1.34 | d [6.6]  | 20.6  |
| Tyrosine         | CH-3,5                         | 7.20 | d [8.5]  | 131.9 |
|                  | CH-2,6                         | 6.90 | d [8.5]  | 116.9 |
| Valine           | $\alpha$ -CH                   | 3.62 |          | 60.6  |
|                  | $\beta$ -CH                    | 2.28 |          | 29.7  |
|                  | $\gamma$ -CH <sub>3</sub>      | 1.00 | d [7.0]  | 17.9  |
|                  | $\gamma'$ -CH <sub>3</sub>     | 1.05 | d [7.0]  | 19.1  |
| <b>Phenolics</b> |                                |      |          |       |
| Chlorogenic acid | $\alpha$ -CH=                  | 6.42 | d [16.0] | 115.8 |
|                  | $\beta$ -CH=                   | 7.68 | d [16.0] |       |
|                  | CH <sub>2</sub> -2             | 2.20 | m        |       |
|                  | CH-3                           | 5.33 | m        | 72.2  |
|                  | CH-4                           | 3.88 |          |       |
|                  | CH-5                           | 4.26 |          | 71.6  |
|                  | CH <sub>2</sub> -6             | 2.04 | m        |       |
| Caffeic acid     | $\alpha$ -CH=                  | 6.35 | d [16.0] |       |
|                  | $\beta$ -CH=                   | 7.29 | d [16.0] |       |

**Miscellaneous  
metabolites**

|              |                               |      |   |      |
|--------------|-------------------------------|------|---|------|
| Choline      | ${}^+\text{N}(\text{CH}_3)_3$ | 3.21 | s | 55.1 |
|              | $\alpha\text{-CH}_2$          | 3.81 |   | 68.5 |
| Trigonelline | CH-1                          | 9.12 | s |      |
|              | CH-3,5                        | 8.84 |   |      |
|              | CH-4                          | 8.08 |   |      |

**Table S3.** Metabolites identified in the 600.13 MHz  ${}^1\text{H}$  NMR spectra (28 °C) of potato organic extracts in  $\text{CDCl}_3/\text{CD}_3\text{OD}$  2:1 *v/v* mixture.

| Compound                    | Assignment           | ${}^1\text{H}$ (ppm) | Multiplicity: J [Hz] | ${}^{13}\text{C}$ (ppm) |
|-----------------------------|----------------------|----------------------|----------------------|-------------------------|
| Mono-unsaturated fatty      |                      |                      |                      |                         |
| chain<br>(Cn:1 $\Delta^9$ ) | COO                  |                      |                      | 174.4                   |
|                             | CH <sub>2</sub> -2   | 2.30                 |                      | 34.6                    |
|                             | CH <sub>2</sub> -3   | 1.57                 | m                    | 25.4                    |
|                             | CH <sub>2</sub> -4,7 | 1.30                 | m                    | 29.5                    |
|                             | CH <sub>2</sub> -8   | 2.01                 | m                    | 27.6                    |
|                             | CH=CH 9,10           | 5.30                 | m                    | 130.4                   |
|                             | CH <sub>2</sub> -11  | 2.01                 | m                    | 27.6                    |
|                             | CH <sub>2</sub>      | 1.33-1.28            | m                    | 29.6-31.7               |
|                             | CH <sub>2</sub> -n-1 | 1.26                 | m                    | 22.9                    |
|                             | CH <sub>3</sub> -n   | 0.84                 | t                    | 14.2                    |
| Di-unsaturated fatty chain  |                      |                      |                      |                         |
| (Cn:2 $\Delta^{9,12}$ )     | COO                  |                      |                      | 174.4                   |
|                             | CH <sub>2</sub> -2   | 2.30                 |                      | 34.6                    |
|                             | CH <sub>2</sub> -3   | 1.57                 | m                    | 25.4                    |
|                             | CH <sub>2</sub> -4,7 | 1.32-1.28            | m                    | 29.5                    |
|                             | CH <sub>2</sub> -8   | 2.02                 | m                    | 27.6                    |
|                             | CH= 9                | 5.32                 | m                    | 130.4                   |
|                             | CH= 10               | 5.30                 | m                    | 128.6                   |
|                             | CH <sub>2</sub> -11  | 2.73                 | t [6.8]              | 26.0                    |
|                             | CH= 12               | 5.30                 | m                    | 128.6                   |
|                             | CH= 13               | 5.32                 | m                    | 130.4                   |
|                             | CH <sub>2</sub> -14  | 2.02                 | m                    | 27.6                    |
|                             | CH <sub>2</sub>      | 1.26-1.27            | m                    | 29.4-31.7               |
|                             | CH <sub>2</sub> -n-1 | 1.23                 | m                    | 22.9                    |

|                                                      |                      |            |         |           |
|------------------------------------------------------|----------------------|------------|---------|-----------|
|                                                      | CH <sub>3</sub> -n   | 0.85       | t       | 14.2      |
| Linolenic fatty chain<br>(C18:3 $\Delta^{9,12,15}$ ) | COO                  |            |         | 174.4     |
|                                                      | CH <sub>2</sub> -2   | 2.30       |         | 34.6      |
|                                                      | CH <sub>2</sub> -3   | 1.57       | m       | 25.4      |
|                                                      | CH <sub>2</sub> -4,7 | 1.30       | m       | 29.5      |
|                                                      | CH <sub>2</sub> -8   | 2.03       | m       | 27.6      |
|                                                      | CH= 9                | 5.32       | m       | 130.4     |
|                                                      | CH= 10               | 5.30       | m       | 128.6     |
|                                                      | CH <sub>2</sub> 11   | 2.77       | t [6.2] | 26.0      |
|                                                      | CH=CH 12,13          | 5.30       | m       | 128.6     |
|                                                      | CH <sub>2</sub> -14  | 2.77       | t [6.2] | 26.0      |
|                                                      | CH= 15               | 5.27       | m       | 127.5     |
|                                                      | CH= 16               | 5.34       | m       | 132.2     |
|                                                      | CH <sub>2</sub> -17  | 2.03       | m       | 20.9      |
|                                                      | CH <sub>3</sub> -18  | 0.94       | t [7.6] | 14.4      |
| Saturated fatty acids                                | COO                  |            |         | 174.4     |
|                                                      | CH <sub>2</sub> -2   | 2.28       |         | 34.6      |
|                                                      | CH <sub>2</sub> -3   | 1.57       | m       | 25.4      |
|                                                      | CH <sub>2</sub>      | 1.28-1.22  | m       | 29.6-32.0 |
|                                                      | CH <sub>2</sub> n-1  | 1.25       |         | 23.0      |
|                                                      | CH <sub>3</sub> n    | 0.84       | t       | 14.2      |
| $\beta$ -Sitosterol                                  | CH <sub>2</sub> -1   | 1.83; 1.04 |         | 37.3      |
|                                                      | CH-3                 | 3.51       |         | 71.6      |
|                                                      | CH-6                 | 5.33       |         | 122.3     |
|                                                      | CH <sub>2</sub> -7   | 1.96; 1.47 |         | 32.3      |
|                                                      | CH-8                 | 1.44       |         | 32.4      |
|                                                      | CH-9                 | 0.90       |         | 50.6      |
|                                                      | CH <sub>2</sub> -11  | 1.47       |         | 21.4      |
|                                                      | CH <sub>2</sub> -12  | 1.99; 1.14 |         | 40.2      |
|                                                      | CH-14                | 0.97       |         | 57.2      |
|                                                      | C-13                 |            |         | 42.9      |
|                                                      | CH <sub>2</sub> -15  | 1.55; 1.05 |         | 24.7      |
|                                                      | CH <sub>2</sub> -16  | 1.83; 1.25 |         | 28.6      |
|                                                      | CH-17                | 1.09       |         | 56.4      |
| CH <sub>3</sub> -18                                  | 0.66                 | s          | 12.1    |           |
| CH <sub>3</sub> -19                                  | 0.97                 |            | 19.5    |           |

|                                                           |                                               |            |         |       |
|-----------------------------------------------------------|-----------------------------------------------|------------|---------|-------|
|                                                           | CH-20                                         | 1.36       |         | 36.5  |
|                                                           | CH <sub>3</sub> -21                           | 0.90       |         | 19.1  |
|                                                           | CH <sub>2</sub> -22                           | 1.27; 1.00 |         | 34.5  |
|                                                           | CH <sub>2</sub> -23                           | 1.14       |         | 26.5  |
|                                                           | CH-24                                         | 0.90       |         | 46.1  |
|                                                           | CH <sub>3</sub> -26                           | 0.80       |         | 20.0  |
|                                                           | CH <sub>3</sub> -27                           | 0.79       |         | 19.2  |
|                                                           | CH <sub>2</sub> -28                           | 1.26       |         | 22.9  |
|                                                           | CH <sub>3</sub> -29                           | 0.81       |         | 12.2  |
| 1,2-Diacyl- <i>sn</i> -glycero-3-phosphatidylethanolamine | CH <sub>2</sub> N                             | 3.13       | t [5.0] | 40.6  |
|                                                           | CH <sub>2</sub> OP                            | 4.08       |         | 62.5  |
|                                                           | CH <sub>2</sub> <i>sn</i> 1                   | 4.35; 4.13 |         | 62.6  |
|                                                           | CH <i>sn</i> 2                                | 5.20       |         | 70.4  |
|                                                           | CH <sub>2</sub> <i>sn</i> 3                   | 4.04       |         | 64.7  |
| 1,2-Diacyl- <i>sn</i> -glycero-3-phosphatidylcholine      | <sup>+</sup> N(CH <sub>3</sub> ) <sub>3</sub> | 3.21       | s       | 54.5  |
|                                                           | CH <sub>2</sub> N <sup>+</sup>                | 3.64       |         | 66.5  |
|                                                           | CH <sub>2</sub> OP                            | 4.31       |         | 60.1  |
|                                                           | CH <sub>2</sub> <i>sn</i> 1                   | 4.35; 4.13 |         | 62.6  |
|                                                           | CH <i>sn</i> 2                                | 5.20       |         | 70.4  |
|                                                           | CH <sub>2</sub> <i>sn</i> 3                   | 4.04       |         | 64.7  |
| Digalactosyldiacylglycerol                                | CH <sub>2</sub> <i>sn</i> 1                   | 4.34; 4.19 |         | 63.2  |
|                                                           | CH <i>sn</i> 2                                | 5.22       |         | 70.6  |
|                                                           | CH <sub>2</sub> <i>sn</i> 3                   | 3.91; 3.67 |         | 68.1  |
|                                                           | CH-1''                                        | 4.87       | d [3.8] | 99.7  |
|                                                           | CH-2''                                        | 3.76       |         | 69.4  |
|                                                           | CH-3''; CH-5''                                | 3.70       |         | 70.6  |
|                                                           | CH-4''                                        | 3.91       |         | 70.2  |
|                                                           | CH <sub>2</sub> -6''                          | 3.81; 3.73 |         | 62.1  |
|                                                           | CH-1'                                         | 4.19       |         | 104.3 |
|                                                           | CH-2'                                         | 3.49       |         | 71.6  |
|                                                           | CH-3'                                         | 3.47       |         | 73.7  |
|                                                           | CH-4'                                         | 3.88       |         | 68.6  |

---

**Table S4.** Compounds identified with RP-HPLC-PDA-ESI-MSn analysis. The respective retention time,  $\lambda$  Max,  $m/z$  and fragment are reported.

| <b>Compound</b>      | <b>Retention time<br/>(min)</b> | <b><math>\lambda</math> Max<br/>(nm)</b> | <b><math>m/z</math> [M-<br/>H]</b> | <b>Fragment</b>                  |
|----------------------|---------------------------------|------------------------------------------|------------------------------------|----------------------------------|
| Caffeic acid         | 0.56                            | 295, 325                                 | 179                                | 135 (100)                        |
| Chlorogenic<br>acid  | 1.10                            | 262, 321                                 | 353                                | 191 (100), 179 (80), 135<br>(20) |
| Gallic acid          | 2.63                            | 221, 269                                 | 169                                | 125 (100)                        |
| Ferulic acid         | 2.93                            | 236, 322                                 | 193                                | 134 (100)                        |
| Galacturonic<br>acid | 4.03                            | 208                                      | 193                                | 149 (100)                        |
